# Supplementary material for: The levels of pattern-triggered immunity in the root and stembase of tomato cultivars positively correlate with the resistance to Ralstonia solanacearum
Source: PubMed Central journal article supplement (PMC11599649; doi:10.1186/s40529-024-00441-z), 2024-11-26
Supplement: 40529_2024_441_MOESM1_ESM.pdf [file 40529_2024_441_MOESM1_ESM.pdf]

**Fig. S1**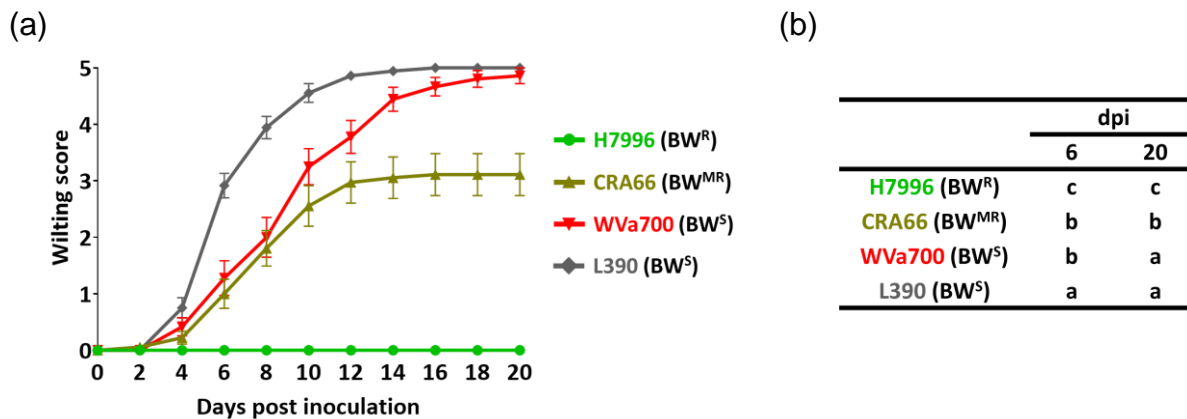**Fig. S1 Differential responses of tomato cultivars to the infection of *Rs* strain Pss4.**

Three-week-old tomato plants were inoculated with *Rs* Pss4 by soil-drench and then kept at 25°C for 20 days. (a) Wilting progress of plants after inoculation ( $OD_{600} = 0.3$ ). The wilting index ranges from 0 to 5 : 0 = no symptoms, 1 = one leaf partially wilted, 2 = two to three leaves wilted, 3 = all except the top two or three leaves wilted, 4 = all leaves wilted, and 5 = plant dead. Values are means  $\pm$  standard errors (SEs) from four independent trials with similar results ( $n = 36$ ). (b) Statistical analysis of wilting progress at the indicated days after inoculation using one-way ANOVA with Tukey's HSD ( $p < 0.05$ ).

**Fig. S2**

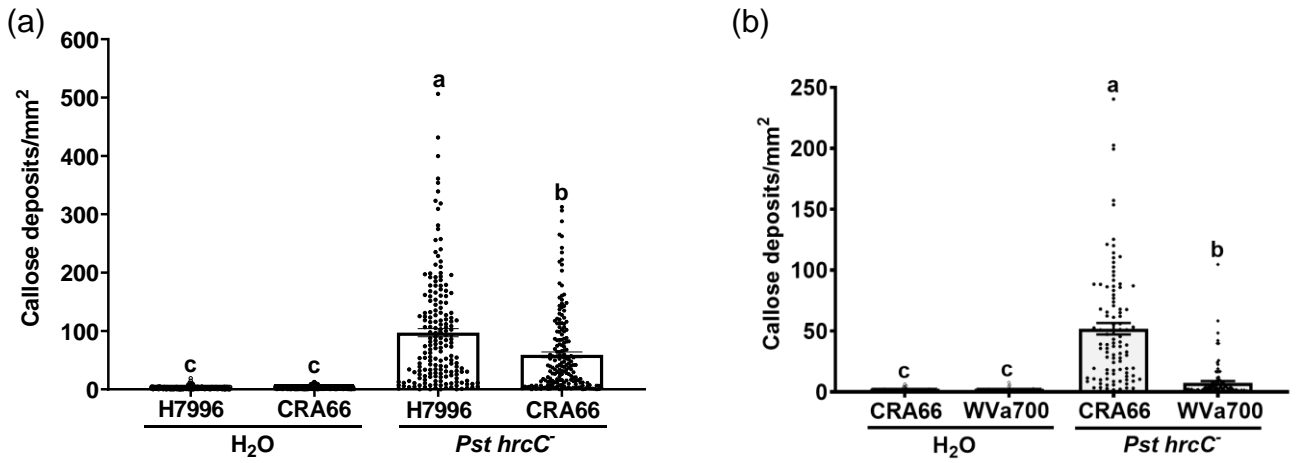

**Fig. S2 PTI-related callose deposition in leaves positively correlates with BW resistance in tomato plants.**

Determination of the leaf PTI responses induced by a T3SS<sup>-</sup> mutant strain *hrcC*<sup>-</sup> of *Pst* (OD<sub>600</sub> = 0.3) in three-week-old H7996 (BW<sup>R</sup>), CRA66 (BW<sup>MR</sup>) and WVa700 (BW<sup>S</sup>) plants. Twenty-four hours after inoculation, leaves were stained with aniline blue to reveal callose deposits, and the fluorescence signals were quantified. (a) n = 183. (b) n = 100. Values are means ± SEs from at least three independent experiments with similar results.
